# Supplementary material
Source: PubMed Central journal article supplement (PMC5885266)
Supplement: jamaneurol-75-410-s001.pdf [file jamaneurol-75-410-s001.pdf]

## Supplementary Online Content

Gáinza-Lein M, Sánchez Fernández I, Jackson M, et al; Pediatric Status Epilepticus Research Group. Association of time to treatment with short-term outcomes for pediatric patients with refractory convulsive status epilepticus. *JAMA Neurol*. Published online January 22, 2018. 10.1001/jamaneurol.2017.4382

**eTable 1.** Summary of Cases Who Died During RCSE Hospitalization

**eTable 2.** Untimely First Benzodiazepine ( $\geq 10$  Minutes) and Clinical Outcomes Stratified by Prehospital RCSE Onset (N=139)

**eTable 3.** Untimely First Benzodiazepine ( $\geq 10$  Minutes) and Clinical Outcomes Stratified by Inhospital RCSE Onset (N=79)

**eTable 4.** Time from RCSE Onset to Treatment in the Prehospital and Inhospital Setting

This supplementary material has been provided by the authors to give readers additional information about their work.

**eTable 1.** Summary of Cases Who Died During RCSE Hospitalization

| Case | Age              | Sex | Days to death | Time to first benzodiazepine (min) | Previous diagnosis                                        | Cause of death                                                                                               |
|------|------------------|-----|---------------|------------------------------------|-----------------------------------------------------------|--------------------------------------------------------------------------------------------------------------|
| 1    | 21 months        | F   | 15            | 35                                 | No prior seizures                                         | RCSE. MRI revealed cerebellar hypoplasia. Family opted for supportive care                                   |
| 2    | 12 years         | M   | 5             | 72                                 | Refractory epilepsy                                       | RCSE, shock and metabolic acidosis                                                                           |
| 3    | 17 years         | F   | 14            | 26                                 | Refractory epilepsy                                       | RCSE, encephalopathy of unknown etiology                                                                     |
| 4    | 1 year 10 months | M   | 7             | 115                                | Neurodegenerative disorder, suspected to be mitochondrial | RCSE on EEG until discontinuation of care. Family opted for supportive care                                  |
| 5    | 2 years 6 months | M   | 60            | 15                                 | No prior seizures                                         | RCSE and progressive meningoencephalitis of unclear etiology                                                 |
| 6    | 11 years         | M   | 49            | 15                                 | No prior seizures                                         | RCSE, FIRES, multi-system organ failure and abdominal compartment syndrome. Family opted for supportive care |
| 7    | 4 months         | M   | 32            | 720                                | Prune belly syndrome, no prior seizures                   | RCSE presentation secondary to a stroke                                                                      |

**Legend:** RCSE: refractory status epilepticus. **M:** male. **F:** female. **EEG:** electroencephalogram. **FIRES:** febrile infection-related epilepsy syndrome. **Min:** minutes.

**eTable 2.** Untimely First Benzodiazepine ( $\geq 10$  Minutes) and Clinical Outcomes Stratified by Prehospital RCSE Onset (N=139)

|                                                       | Outcome proportion | Univariate Analysis                  |         | Multivariate Analysis |            |                |              |
|-------------------------------------------------------|--------------------|--------------------------------------|---------|-----------------------|------------|----------------|--------------|
|                                                       | No. (%)            | Received Untimely Treatment, No. (%) | P value | AOR                   | Std. Error | 95% C.I.       | P value      |
| <b>Death</b>                                          | 5 (4%)             | 5 (100%)                             | 0.6     | 5                     | -          | 0.49, $\infty$ | 0.19         |
| <b><math>\geq 1</math> continuous infusions</b>       | 74 (53%)           | 61 (82%)                             | 0.1     | 2.5                   | 1.1        | 1.05, 5.91     | <b>0.039</b> |
| <b>More than median convulsive duration (2 hours)</b> | 88 (%)             | 67 (%)                               | 0.8     | 1.3                   | 0.6        | 0.52, 3.18     | 0.6          |
| <b>Decline in baseline function at discharge</b>      | 28 (%)             | 25 (%)                               | 0.08    | 4.4                   | 3.3        | 1.00, 18.92    | 0.05         |
| <b>ICU &gt; median duration (4 days)</b>              | 65 (%)             | 51 (%)                               | 0.8     | 1.6                   | 0.7        | 0.66, 3.76     | 0.3          |
| <b>Hypotension</b>                                    | 45 (%)             | 36 (%)                               | 0.7     | 1.8                   | 0.9        | 0.72, 4.60     | 0.2          |
| <b>Other medical complications</b>                    | 33 (%)             | 28 (%)                               | 0.3     | 1.9                   | 1.1        | 0.63, 5.69     | 0.3          |

**Legend:** eTable 2 provides the results of AORs using multivariate regression models, with untimely first-line benzodiazepine treatment ( $\geq 10$  minutes) as the predictor and the listed outcomes, in a subpopulation who had a RCSE onset in the prehospital setting. Death was adjusted for structural etiology, febrile RCSE, age, and no previous neurological history, and the other outcomes were adjusted for age, structural etiology, febrile RCSE, no previous neurological history, generalized RCSE, continuous RCSE and  $\geq 5$  ASM.

**N:** number. **ICU:** intensive care unit. **AOR:** adjusted odds ratio. **C.I.:** confidence interval. **Std.:** standard.

\* Decline in baseline function at discharge: not able to do the same tasks as before at discharge.

**eTable 3.** Untimely First Benzodiazepine ( $\geq 10$  Minutes) and Clinical Outcomes Stratified by Inhospital RCSE Onset (N=79)

|                                                       | Outcome proportion | Univariate Analysis                  |         | Multivariate Analysis |            |                |             |
|-------------------------------------------------------|--------------------|--------------------------------------|---------|-----------------------|------------|----------------|-------------|
|                                                       | No. (%)            | Received Untimely Treatment, No. (%) | P value | AOR                   | Std. Error | 95% C.I.       | P value     |
| <b>Death</b>                                          | 2 (%)              | 2 (100%)                             | 0.6     | 3.6                   | -          | 0.27, $\infty$ | 0.33        |
| <b><math>\geq 1</math> continuous infusions</b>       | 38 (53%)           | 19 (82%)                             | 0.6     | 4.1                   | 2.2        | 1.42, 11.98    | <b>0.01</b> |
| <b>More than median convulsive duration (2 hours)</b> | 34 (%)             | 22 (%)                               | 0.007   | 1.4                   | 0.7        | 0.55, 3.58     | 0.5         |
| <b>Decline in baseline function at discharge</b>      | 19 (%)             | 8 (%)                                | 1       | 1.1                   | 0.6        | 0.32, 3.4      | 0.9         |
| <b>ICU &gt; median duration (4 days)</b>              | 50 (%)             | 24 (%)                               | 0.8     | 1.5                   | 0.8        | 0.54, 4.24     | 0.4         |
| <b>Hypotension</b>                                    | 19 (%)             | 13 (%)                               | 0.04    | 3.2                   | 2.0        | 0.94, 11.00    | <b>0.06</b> |
| <b>Other medical complications</b>                    | 25 (%)             | 11 (%)                               | 0.8     | 0.8                   | 0.4        | 0.27, 2.11     | 0.6         |

**Legend:** eTable 3 provides the results of AORs using multivariate regression models, with untimely first-line benzodiazepine treatment ( $\geq 10$  minutes) as the predictor and the listed outcomes, in a subpopulation who had a RCSE onset in the in-hospital setting. Death was adjusted for structural etiology, febrile RCSE, age, and no previous neurological history, and the other outcomes were adjusted for age, structural etiology, febrile RCSE, no previous neurological history, generalized RCSE, continuous RCSE and  $\geq 5$  ASM.

**N:** number. **ICU:** intensive care unit. **AOR:** adjusted odds ratio. **C.I.:** confidence interval. **Std.:** standard.

\* Decline in baseline function at discharge: not able to do the same tasks as before at discharge.

**eTable 4.** Time from RCSE Onset to Treatment in the Prehospital and Inhospital Setting

| Time from SE onset (minutes)                       | Total N | Time to treatment [minutes (IQR)] | Prehospital SE onset [minutes (IQR)] | Inhospital SE onset [minutes (IQR)] | P value                   |
|----------------------------------------------------|---------|-----------------------------------|--------------------------------------|-------------------------------------|---------------------------|
| Time until calling medical services                | 120     | 5 (0-17.5)                        | 10 (2-53)                            | 0 (0-1)                             | <b><i>p</i>&lt;0.0001</b> |
| Time until EMS arrival                             | 63      | 16 (10-25)                        | 16 (10-25)                           | -                                   | -                         |
| Time until hospital arrival                        | 106     | 45 (30-80)                        | 45 (30-80)                           | -                                   | -                         |
| <b>Time from RCSE onset to treatment (minutes)</b> |         |                                   |                                      |                                     |                           |
| 1 <sup>st</sup> BZD                                | 218     | 17 (5 – 45)                       | 25 (10 - 60)                         | 8 (4-24)                            | <b><i>p</i>&lt;0.0001</b> |
| 2 <sup>nd</sup> BZD                                | 184     | 36 (17 - 79)                      | 43.5 (22 – 96)                       | 20.5 (10-45)                        | <b><i>p</i>=0.0001</b>    |
| 3 <sup>rd</sup> BZD                                | 120     | 60 (30–155.5)                     | 65 (45–149)                          | 40 (22 – 189)                       | <b><i>p</i>=0.04</b>      |
| 1 <sup>st</sup> Non-BZD ASM                        | 206     | 63 (33 –150)                      | 82 (45-170)                          | 40 (22-74)                          | <b><i>p</i>&lt;0.0001</b> |
| 2 <sup>nd</sup> Non-BZD ASM                        | 170     | 120 (60 – 260)                    | 131 (75.5 – 330)                     | 74 (40 – 206)                       | <b><i>p</i>=0.002</b>     |
| 3 <sup>rd</sup> Non-BZD ASM                        | 88      | 254 (97 – 665)                    | 298 (122.5 – 750)                    | 159.5 (91 – 390)                    | <i>p</i> =0.11            |
| 1 <sup>st</sup> Continuous infusion                | 98      | 176 (120-645)                     | 172 (118-904)                        | 192 (120-510)                       | <i>p</i> =0.5             |
| 2 <sup>nd</sup> Continuous infusion                | 24      | 1500 (603.5-2295)                 | 1440 (757-2040)                      | 1560 (450-2880)                     | <i>p</i> =0.7             |

**Legend:** RCSE: refractory convulsive status epilepticus. N: number. IQR: interquartile range. EMS: Emergency Medical Services. pSERG: pediatric Status Epilepticus Research Group. BZD: benzodiazepine drug. ASM: anti-seizure medication.

\*total N differ, as not all patients were treated with the same drugs, received the same services, or had the information available. Having a known time to first BZD was an eligibility criteria, but not the time to other treatment or services.
